# Supplementary material
Source: HighWire-hosted journal article supplement (https://jnm.snmjournals.org/highwire/filestream/94286/field_highwire_adjunct_files/0/94375_Supplemental_Data.pdf)
Supplement: 94375_Supplemental_Data.pdf [file 94375_Supplemental_Data.pdf]

## Materials and Methods

All reagents were obtained from commercial sources and used without further purification. Rink amide 4-methyl-benzhydrylalanine (MBHA) resin and all amino acids are available from NovaBiochem (Laeufelfingen, Switzerland) or NeoMPS (Strasbourg, France). DOTA-tris(<sup>t</sup>Bu ester) and NODAGA-tris(<sup>t</sup>Bu ester) were purchased from CheMatech (Dijon, France). The synthesis of CB-TE1A1A(<sup>t</sup>Bu ester) will be reported elsewhere. The N<sub>4</sub>(Boc)<sub>4</sub>-COOH was synthesized according to the protocol described recently (1). <sup>111</sup>InCl<sub>3</sub>, <sup>67</sup>GaCl<sub>3</sub> and <sup>99m</sup>Mo/<sup>99m</sup>Tc generator from which <sup>99m</sup>Tc was eluted as Na[<sup>99m</sup>Tc]TcO<sub>4</sub> were purchased from Covidien Medical (Petten, Netherlands). <sup>68</sup>Ga was eluted and purified from a commercially available generator (Obninsk, Russia) according to Zhernosekov, et al. (2). <sup>64</sup>CuCl<sub>2</sub> was purchased from University Hospital of Tübingen (Germany). BIM26226 was provided by Ipsen Biotech (Paris, France). Electrospray ionization mass spectroscopy was carried out with a Finnigan SSQ-7000-spectrometer (Bremen, Germany). Analytical high-performance liquid chromatography (HPLC) was performed on a Hewlett Packard 1050-HPLC-system with a multi-wavelength detector and a flow-through Berthold LB-506-Cl  $\gamma$ -detector using a Macherey-Nagel Nucleosil 120 C<sub>18</sub>-column (Oensingen, Switzerland) (eluents: A=0.1% TFA in water and B=acetonitrile; gradient: 0-30 min, 95%-30% A; flow: 0.750 mL/min). Preparative HPLC was performed on a Metrohm HPLC-system LC-CaDI 22-14 (Herisau, Switzerland) with a Macherey-Nagel VP 250/21 Nucleosil 100-5 C<sub>18</sub>-column (gradient: 0-20 min, 90%-50% A; flow: 10 mL/min). Quantitative  $\gamma$ -counting was performed on a COBRA 5003  $\gamma$ -system well counter from Packard Instruments (Packard, Meriden, CT, USA).

### Radiolabeling of chelator-peptide conjugates

**<sup>111</sup>In-DOTA-AR:** This radioligand was prepared by dissolving 10  $\mu$ g peptides in 250  $\mu$ L sodium acetate buffer (0.4 mol/L, pH 5.0), followed by incubation with <sup>111</sup>InCl<sub>3</sub> (100-180 MBq) for 30 min at 95°C.

**<sup>67/68</sup>Ga-NODAGA-AR:** Purified <sup>68</sup>Ga(III) (250-300 MBq) was used directly for the labeling of NODAGA-AR-02 (10  $\mu$ g) in NH<sub>4</sub>-acetate buffer (0.2 mol/L, pH 4.0) followed by incubation for 10 min at RT. <sup>67</sup>Ga-NODAGA-AR was obtained using the same labeling conditions and 100-180 MBq of <sup>67</sup>GaCl<sub>3</sub>.

**<sup>64</sup>Cu-CB-TE2A-AR:** The labeling was performed by modifying and optimizing the protocol published previously (32). In brief, 10 µg of the peptide was dissolved in 250 µL of NH<sub>4</sub>-acetate buffer (0.1 mol/L, pH 8.0) followed by incubation with <sup>64</sup>CuCl<sub>2</sub> (100-120 MBq) at 95°C.

**<sup>99m</sup>Tc-N4-AR:** A similar protocol as published recently was used (33). A stock solution of N4-AR (1 mmol/L) was prepared by dissolution in a mixture (8:2 v/v) of acetic acid (50 mmol/L) and ethanol. A mixture of phosphate buffer (0.5 mol/L, pH 11.5; 50 µL) and sodium citrate (0.1 mol/L, 5 µL) was taken up in an Eppendorf tube. Na<sup>99m</sup>TcTcO<sub>4</sub> generator eluate (650–750 MBq, 700 µL), N4-AR solution (31 µg, 20 µL) and freshly prepared SnCl<sub>2</sub> solution in ethanol (25 mg, 25 µL) were added to this mixture. The reaction mixture was incubated at room temperature for 30 min.

Supplemental Table 1: Analytical data of the purified conjugates

| Compound          | Purity (%) | MS (ESI): m/z (%)                                                   | Rt (min) | RP-HPLC Gradient    |
|-------------------|------------|---------------------------------------------------------------------|----------|---------------------|
| <b>DOTA-AR</b>    | 98.1       | 1747.7 (100) [M+H] <sup>+</sup>                                     | 19.1     | 0-30 min, 95%-30% A |
| <b>NODAGA-AR</b>  | 97.4       | 1718.9 (100) [M+H] <sup>+</sup>                                     | 19.4     | 0-30 min, 95%-30% A |
| <b>CB-TE2A-AR</b> | 98.5       | 1685.1 (45) [M+H] <sup>+</sup> ,<br>843.3 (100) [M+H] <sup>2+</sup> | 20.1     | 0-20 min, 95%-30% A |
| <b>N4-AR</b>      | 98.1       | 1546.9 (25) [M+H] <sup>+</sup> ,<br>773.9 (100) [M+H] <sup>2+</sup> | 15.9     | 0-20 min, 95%-50% A |

*DOTA-AR*: purity 98.1%;  $R_t$  = 19.1 min (analytical RP-HPLC; 0-30 min, 95%-30% A); 1747.7 (100) [M+H]<sup>+</sup>.

*NODAGA-AR*: purity 97.4%;  $R_t$  = 19.4 min (analytical RP-HPLC; 0-30 min, 95%-30% A); MS (ESI):  $m/z$  (%): 1718.9 (100) [M+H]<sup>+</sup>.

*CB-TE2A-AR*: purity 98.5%;  $R_t$  = 20.1 min (analytical RP-HPLC; 0-20 min, 95%-30% A); MS (ESI):  $m/z$  (%): 1685.1 (45) [M+H]<sup>+</sup>, 843.3 (100) [M+H]<sup>2+</sup>.

*N4-AR*: purity 98.1%;  $R_t$  = 15.9 min (analytical RP-HPLC; 0-20 min, 95%-50% A); MS (ESI):  $m/z$  (%): 1546.9 (25) [M+H]<sup>+</sup>, 773.9 (100) [M+H]<sup>2+</sup>.

Supplemental Table 2: Biodistribution studies of  $^{111}\text{In}$ -DOTA-AR,  $^{68}\text{Ga}$ -NODAGA-AR,  $^{99\text{m}}\text{Tc}$ -N4-AR and  $^{64}\text{Cu}$ -CB-TE2A-AR in PC-3 tumor-bearing mice in presence of a large excess of cold peptide. Data are expressed as IA%/g (percentage of injected activity per gram tissue) and are presented as mean  $\pm$  SD (n = 4-6).

| Organ            | $^{111}\text{In}$ -<br>DOTA-AR<br>(%ID/g tissue $\pm$ SD) | $^{68}\text{Ga}$ -<br>NODAGA-AR<br>(%ID/g tissue $\pm$ SD) | $^{99\text{m}}\text{Tc}$ -<br>N4-AR<br>(%ID/g tissue $\pm$ SD) | $^{64}\text{Cu}$ -<br>CB-TE2A-AR<br>(%ID/g tissue $\pm$ SD) |
|------------------|-----------------------------------------------------------|------------------------------------------------------------|----------------------------------------------------------------|-------------------------------------------------------------|
|                  | 4h blocked                                                | 1h blocked                                                 | 4h blocked                                                     | 4h blocked                                                  |
| <b>Blood</b>     | 0.01 $\pm$ 0.00                                           | 0.47 $\pm$ 0.27                                            | 0.21 $\pm$ 0.01                                                | 0.51 $\pm$ 0.05                                             |
| <b>Tumor</b>     | 0.45 $\pm$ 0.06                                           | 0.18 $\pm$ 0.06                                            | 0.43 $\pm$ 0.07                                                | 0.69 $\pm$ 0.25                                             |
| <b>Kidneys</b>   | 1.40 $\pm$ 0.29                                           | 0.76 $\pm$ 0.60                                            | 7.08 $\pm$ 1.00                                                | 5.56 $\pm$ 2.94                                             |
| <b>Pancreas</b>  | 0.02 $\pm$ 0.00                                           | 0.30 $\pm$ 0.22                                            | 0.15 $\pm$ 0.02                                                | 0.18 $\pm$ 0.04                                             |
| <b>Muscle</b>    | 0.0 $\pm$ 0.00                                            | 0.61 $\pm$ 0.42                                            | 0.07 $\pm$ 0.02                                                | 0.07 $\pm$ 0.10                                             |
| <b>Intestine</b> | 0.05 $\pm$ 0.04                                           | 0.06 $\pm$ 0.04                                            | 0.26 $\pm$ 0.04                                                | 1.88 $\pm$ 0.23                                             |
| <b>Liver</b>     | 0.09 $\pm$ 0.01                                           | 0.15 $\pm$ 0.01                                            | 2.59 $\pm$ 0.56                                                | 5.77 $\pm$ 1.17                                             |
| <b>Stomach</b>   | 0.03 $\pm$ 0.01                                           | 0.05 $\pm$ 0.02                                            | 0.32 $\pm$ 0.08                                                | 1.61 $\pm$ 0.49                                             |
| <b>Bone</b>      | 0.02 $\pm$ 0.01                                           | 0.08 $\pm$ 0.002                                           | 0.57 $\pm$ 0.08                                                | 0.10 $\pm$ 0.04                                             |

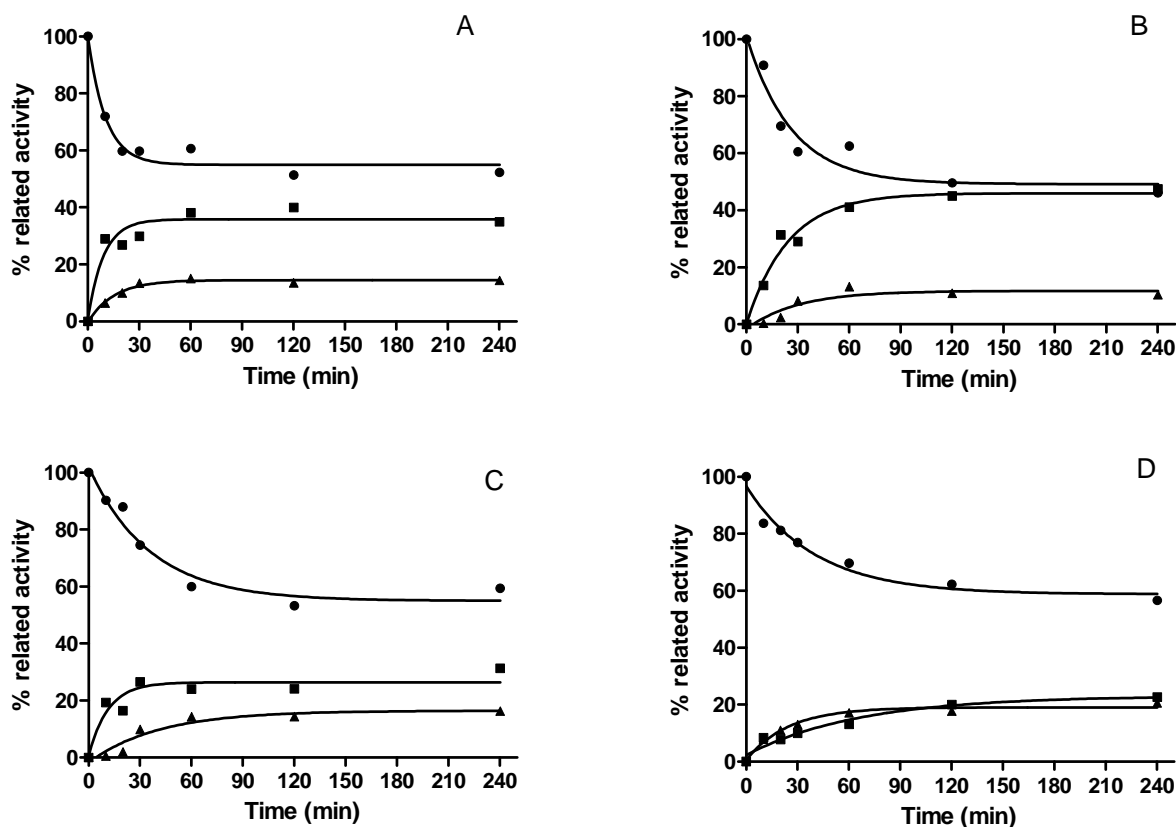

**SUPPLEMENTAL FIGURE 1.** Fate of the receptor bound  $^{111}\text{In}$ -DOTA-AR (A),  $^{67}\text{Ga}$ -NODAGA-AR (B),  $^{64}\text{Cu}$ -CB-TE2A-AR (C) and  $^{99\text{m}}\text{Tc}$ -N4-AR (D) as measured with PC-3 cells. The percentage of bound (●), internalised (▲) and dissociated (■) radioligand was measured with respect to the total receptor bound radioligand in 2h at 4 °C (100%). Values and standard deviations are the result of two independent experiments with triplicates in each experiment.

$$k_{\text{obs}}(\text{N4-AR}) = 0.025 \pm 0.006 \text{ min}^{-1}; T_{1/2} = 27.8 \text{ min}$$

$$k_{\text{obs}}(\text{CB-TE2A-AR}) = 0.028 \pm 0.007 \text{ min}^{-1}; T_{1/2} = 24.9 \text{ min}$$

$$k_{\text{obs}}(\text{DOTA-AR}) = 0.097 \pm 0.022 \text{ min}^{-1}; T_{1/2} = 7.1 \text{ min}$$

$$k_{\text{obs}}(\text{NODAGA-AR}) = 0.037 \pm 0.011 \text{ min}^{-1}; T_{1/2} = 18.3 \text{ min}$$

The equation used is one-phase decay :  $Y = (Y_0 - \text{Plateau}) * \exp(-K * X) + \text{Plateau}$

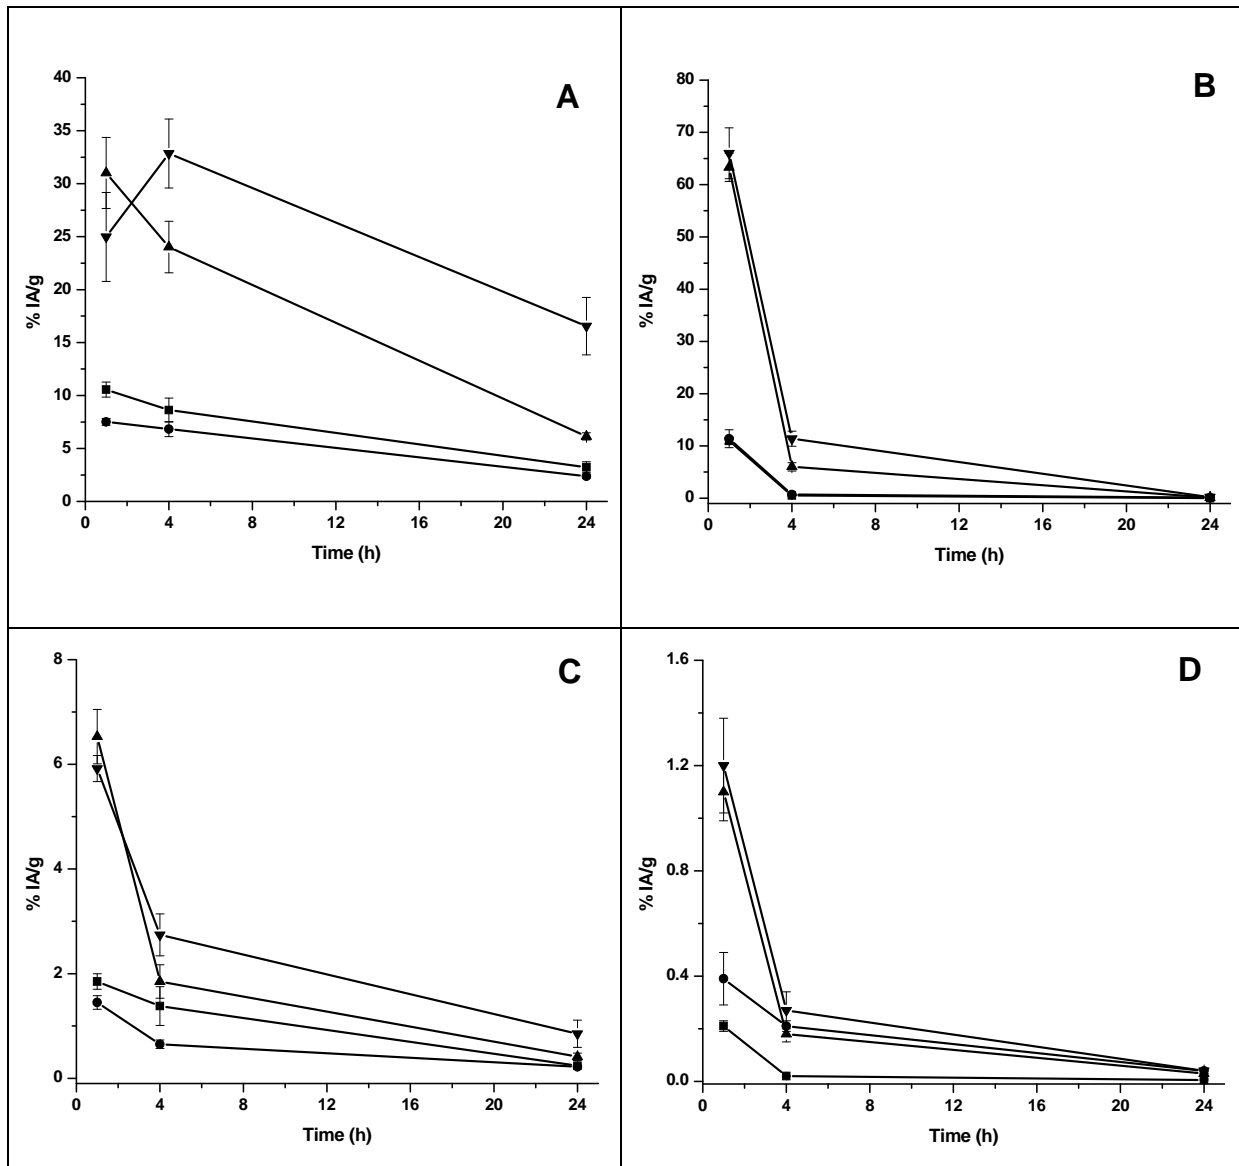

**SUPPLEMENTAL FIGURE 2:** Comparison of uptake and washout kinetics of the radioligands in selected organs as determined by biodistribution studies in PC-3 tumor bearing nude mice. The accumulation/retention of  $^{111}\text{In-DOTA-AR}$  (■),  $^{67}\text{Ga-NODAGA-AR}$  (●),  $^{64}\text{Cu-CB-TE2A-AR}$  (▲) and  $^{99\text{m}}\text{Tc-N4-AR}$  (▼) in tumor (A), pancreas (B), kidney (C) and blood (D) are compared at 1, 4 and 24 after injection. Data are expressed as %IA/g (percentage of injected activity per gram tissue) and are presented as mean  $\pm$  SD ( $n = 4-6$ ). Note differences in Y-axis scale.

## References

1. Abiraj K, Mansi R, Tamma ML, et al. Tetraamine-derived bifunctional chelators for technetium-99m labelling: synthesis, bioconjugation and evaluation as targeted SPECT imaging probes for GRP-receptor-positive tumours. *Chemistry*. Feb 15;16(7):2115-2124.
2. Zhernosekov KP, Filosofov DV, Baum RP, et al. Processing of generator-produced  $^{68}\text{Ga}$  for medical application. *J Nucl Med*. Oct 2007;48(10):1741-1748.
3. Rogers BE, Manna DD, Safavy A. In vitro and in vivo evaluation of a  $^{64}\text{Cu}$ -labeled polyethylene glycol-bombesin conjugate. *Cancer Biother Radiopharm*. Feb 2004;19(1):25-34.
